# Supplementary material
Source: PubMed Central journal article supplement (PMC3099659)
Supplement: supp_M111.240457_jbc.M111.240457-1.pdf [file supp_M111.240457_jbc.M111.240457-1.pdf]

SUPPLEMENTAL DATA

**Inhibition of Human Cytochrome P450 3A4 by Cholesterol**

Raku Shinkyō and F. Peter Guengerich  
*J. Biol. Chem.* **286**, 000-000 (2011)

CONTENTS

**FIGURE S1. Lineweaver-Burk plots for cholesterol inhibition in human liver microsomes.**

**FIGURE S2. Lineweaver-Burk plots for cholesterol inhibition in a reconstituted recombinant P450 3A4 system.**

**FIGURE S3. Time course of cholesterol concentration in human hepatocytes.**

FIGURE S1. **Lineweaver-Burk plots for cholesterol inhibition in human liver microsomes.** *A*, nifedipine oxidation; *B*, quinidine *S*3-hydroxylation; *C*, quinidine *N*-oxygenation. The lines represent the simultaneous fit to the corresponding models defined in Experimental Procedures at free cholesterol concentrations of 1.5 (●), 6.6 (■), 11.7 (▲), and 16.8  $\mu\text{M}$  (○) (from Fig. 3 of main text). See Table 1 for  $K_i$  values.

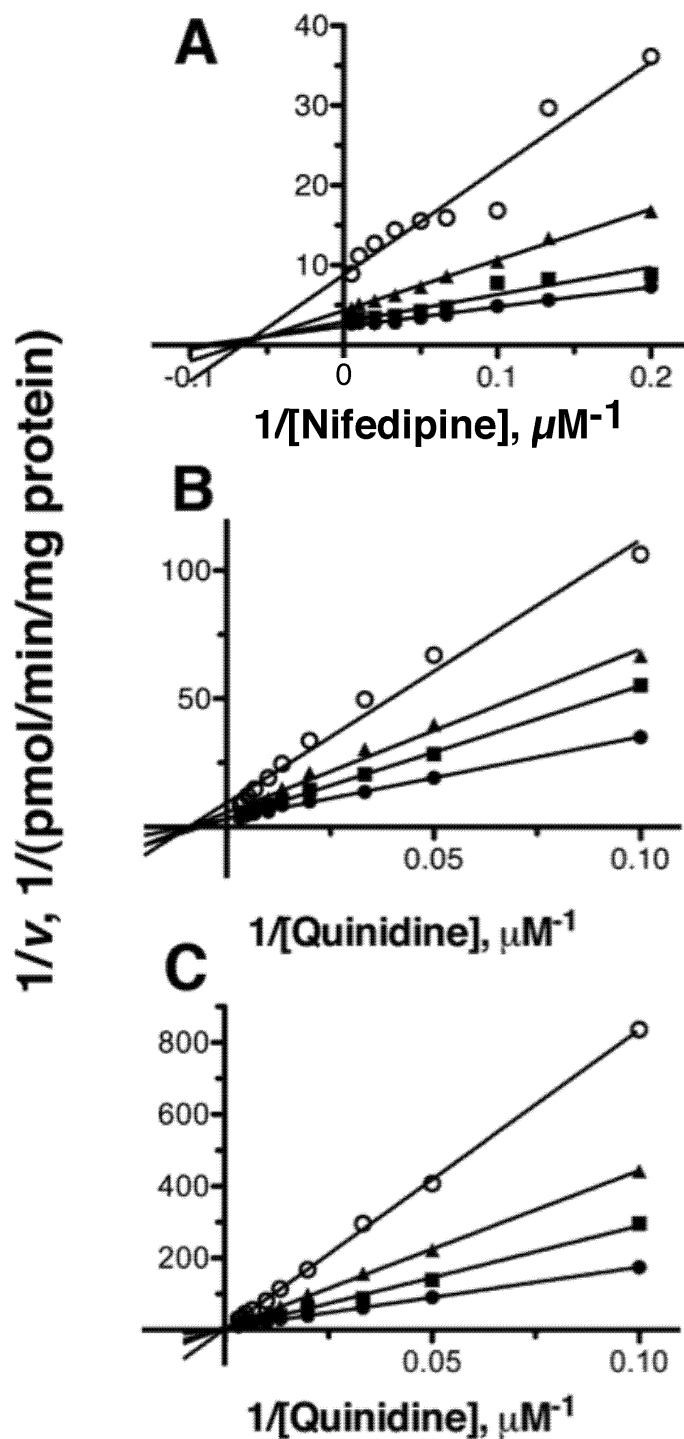

FIGURE S2. **Lineweaver-Burk plots for cholesterol inhibition in a reconstituted recombinant P450 3A4 system.** *A*, nifedipine oxidation; *B*, quinidine *S*3-hydroxylation; *C*, quinidine *N*-oxygenation. The lines represent the simultaneous fit to the corresponding models defined in Experimental Procedures at free cholesterol concentrations of 0 (●), 2.5 (■), 5.1 (▲), 10.2 (○), and 15.3  $\mu\text{M}$  (□). See Fig. 4 of main text and Table 1 for  $K_i$  values.

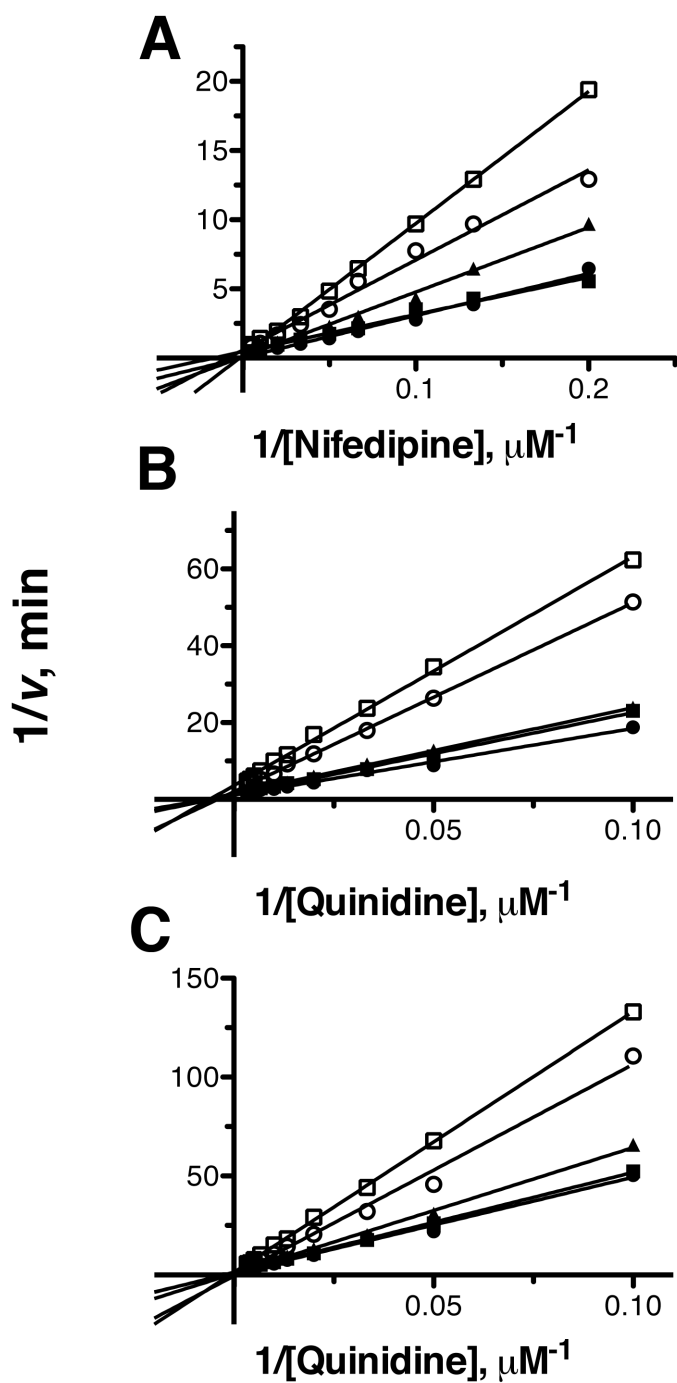

FIGURE S3. Time course of cholesterol concentration in human hepatocytes. ●, no treatment; ■, 200  $\mu$ M cholesterol; ▲, 30  $\mu$ M pravastatin.

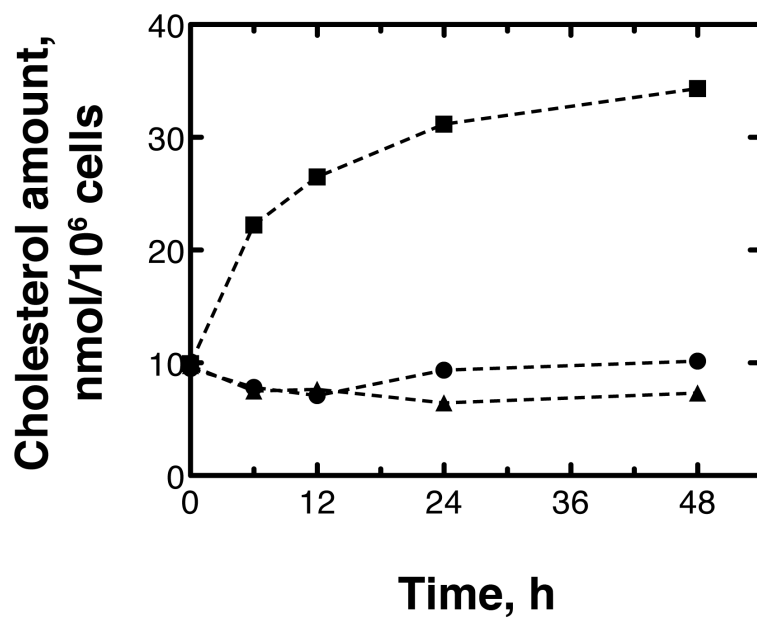

**Fig. S3**
